# Supplementary material
Source: ML conference proceedings conference paper supplement (https://openaccess.thecvf.com/content/WACV2025/html/Khalil_Learning_Keypoints_for_WACV_2025_paper.html)
Supplement: Supplementary file 1 [file Khalil_Learning_Keypoints_for_WACV_2025_supplemental.pdf]

## Supplement

### 1. Additional Experimental Results

#### 1.1. Added computational cost

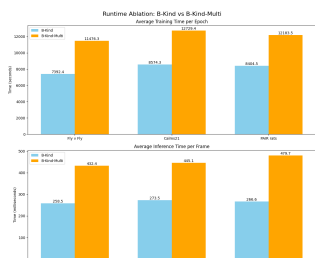

Figure 1. Computational Overhead comparison of B-Kind and B-Kind Multi on different datasets. The training time for B-Kind-Multi is only about 40% longer in both training and inference times.

#### 1.2. Additional Ablations

We conducted several additional ablation studies to systematically evaluate the performance and sensitivity of our proposed method under various experimental conditions.

**Video Segmentation Ablation.** The first set of ablation studies focused on video segmentation techniques, comparing different approaches to extracting features from video sequences (Table 5).

**Loss Function Ablation.** We also performed a comprehensive loss function ablation to understand the contribution of different loss components to the model’s learning process (Table 1).

**Resolution Ablation.** The final ablation explored the impact of image resolution on the model’s capabilities (Table

### 2. Additional Implementation Details

**Architecture Details.** Our method uses ResNet-50 [?] as an encoder  $\Phi$ , GlobalNet [?] as a pose decoder  $\Psi$ , and a series of convolution blocks as a reconstruction decoder  $\psi$ , following the unsupervised keypoint discovery model from [?]. Architecture details about reconstruction decoder is shown in Table 3.

**Hyperparameters.** The hyperparameters for the keypoint discovery model are listed in Table 4. Unless otherwise specified, all models use the SSIM image as the reconstruction target. Each keypoint discovery model is trained on an NVIDIA A100 Tensor Core GPU until the training loss converges.

**Segmentation Parameters.** Our method utilizes the DEVA framework [?] for video object segmentation, guided by text prompts. The parameters for DEVA seg-

| Recon.            | Rot. Eq. | Sep. | %-MSE       |
|-------------------|----------|------|-------------|
| <i>Fly v. Fly</i> |          |      |             |
| ✓                 |          |      | .298 ± .067 |
| ✓                 | ✓        |      | .173 ± .012 |
| ✓                 |          | ✓    | .221 ± .059 |
| ✓                 | ✓        | ✓    | .115 ± .032 |
| <i>CalMS21</i>    |          |      |             |
| ✓                 |          |      | .896 ± .021 |
| ✓                 | ✓        |      | .722 ± .031 |
| ✓                 |          | ✓    | .764 ± .055 |
| ✓                 | ✓        | ✓    | .693 ± .061 |
| <i>PAIR-R24M</i>  |          |      |             |
| ✓                 |          |      | .248 ± .015 |
| ✓                 | ✓        |      | .192 ± .037 |
| ✓                 |          | ✓    | .247 ± .065 |
| ✓                 | ✓        | ✓    | .145 ± .056 |

Table 1. Loss Ablation Results on Fly v. Fly, CalMS21, and PAIR-R24M. “Recon.” represents reconstruction loss, “Rot. Eq.” represents rotation equivariance loss, and “Sep.” represents separation loss. %-MSE error is reported for different combinations of loss functions. Results are from 5 runs.

| Image Resolution  | %-MSE       |
|-------------------|-------------|
| <i>Fly v. Fly</i> |             |
| 128x128           | .129 ± .023 |
| 256x256           | .115 ± .032 |
| 512x512           | .110 ± .038 |
| <i>CalMS21</i>    |             |
| 128x128           | .747 ± .059 |
| 256x256           | .693 ± .061 |
| 512x512           | .603 ± .065 |
| <i>PAIR-R24M</i>  |             |
| 128x128           | .180 ± .031 |
| 256x256           | .168 ± .027 |
| 512x512           | .145 ± .056 |

Table 2. Image resolution ablation on Fly v. Fly, CalMS21, and PAIR-R24M. %-MSE error is reported for different image resolutions. Results are from 5 B-KinD runs.

mentation are detailed in Table 6. In text-prompted mode, we use the following key parameters:

- **DINO\_THRESHOLD:** This is the threshold for DINO to consider a detection as valid. A higher threshold would result in fewer but more confident detections, while a lower threshold might include more detections but with a risk of false positives.
- **prompt:** This is the text prompt used to guide the segmentation. The prompts are separated by a full stop; for example, “rat.mouse”. The wording of the prompt and minor details like pluralization might affect the results. For instance, “cats” might yield different results from “cat”.
- **size:** This is the internal processing resolution for the propagation module, which defaults to 480. A higher resolution might lead to more detailed segmentations but would require more computational resources.

All other parameters were kept at their default values.

| Type        | Input dimension                               | Output dimension | Output size |
|-------------|-----------------------------------------------|------------------|-------------|
| Upsampling  | -                                             | -                | 16x16       |
| Conv_block  | 2048 + # keypoints $\times$ 2 $\times$ agents | 1024             | 16x16       |
| Upsampling  | -                                             | -                | 32x32       |
| Conv_block  | 1024 + # keypoints $\times$ 2 $\times$ agents | 512              | 32x32       |
| Upsampling  | -                                             | -                | 64x64       |
| Conv_block  | 512 + # keypoints $\times$ 2 $\times$ agents  | 256              | 64x64       |
| Upsampling  | -                                             | -                | 128x128     |
| Conv_block  | 256 + # keypoints $\times$ 2 $\times$ agents  | 128              | 128x128     |
| Upsampling  | -                                             | -                | 256x256     |
| Conv_block  | 128 + # keypoints $\times$ 2 $\times$ agents  | 64               | 256x256     |
| Convolution | 64                                            | 3                | 256x256     |

Table 3. **Architecture details of the reconstruction decoder.** “Conv\_block” refers to a basic convolution block which consists of  $3 \times 3$  convolution, batch normalization, and ReLU activation.

| Dataset     | # Keypoints | Batch size | Resolution | Frame Gap | Learning Rate | Agents |
|-------------|-------------|------------|------------|-----------|---------------|--------|
| CalMS21     | 10          | 5          | 256        | 6         | 0.001         | 2      |
| Fly vs. Fly | 10          | 5          | 256        | 3         | 0.001         | 2      |
| PAIR-R24M   | 12          | 5          | 256        | 6         | 0.001         | 2      |

Table 4. **Hyperparameters for Keypoint Discovery.**

| Video Segmentation Type | %-MSE                              |
|-------------------------|------------------------------------|
| <i>CalMS21</i>          |                                    |
| Frame by Frame          | <b>3.454 <math>\pm</math> .167</b> |
| DEVA                    | <b>.693 <math>\pm</math> .061</b>  |
| <i>Fly v. Fly</i>       |                                    |
| Frame by Frame          | <b>2.531 <math>\pm</math> .097</b> |
| DEVA                    | <b>.115 <math>\pm</math> .032</b>  |
| <i>PAIR-R24M</i>        |                                    |
| Frame by Frame          | <b>2.874 <math>\pm</math> .121</b> |
| DEVA                    | <b>.168 <math>\pm</math> .027</b>  |

Table 5. **Video segmentation ablation on CalMS21, Fly, and PAIRS.** %-MSE error is reported by changing the segmentation type. Extracted features correspond to keypoint locations, confidence, and covariance. Results are from 5 B-KinD runs.

| Dataset     | Grounded Segmentation Prompt | DINO Threshold | Size |
|-------------|------------------------------|----------------|------|
| CalMS21     | rat.mouse                    | 0.45           | 480  |
| Fly vs. Fly | fly                          | 0.5            | 480  |
| PAIR-R24M   | rat.mouse                    | 0.45           | 480  |

Table 6. **Parameters for Segmentation.**
